# Supplementary material
Source: publisher figshare collection journal article supplement (https://acs.figshare.com/ndownloader/files/4292653)
Supplement: Supplementary file 1 [file 4292653]

 
data_f 
 
_audit_creation_method            SHELXL-97 
_chemical_name_systematic 
; 
 ? 
; 
_chemical_name_common             ? 
_chemical_melting_point           ? 
_chemical_formula_moiety          ? 
_chemical_formula_sum 
 'C10 H26 Cl Cr F2 N4 O5' 
_chemical_formula_weight          407.80 
 
loop_ 
 _atom_type_symbol 
 _atom_type_description 
 _atom_type_scat_dispersion_real 
 _atom_type_scat_dispersion_imag 
 _atom_type_scat_source 
 'C'  'C'   0.0033   0.0016 
 'International Tables Vol C Tables 4.2.6.8 and 6.1.1.4' 
 'H'  'H'   0.0000   0.0000 
 'International Tables Vol C Tables 4.2.6.8 and 6.1.1.4' 
 'N'  'N'   0.0061   0.0033 
 'International Tables Vol C Tables 4.2.6.8 and 6.1.1.4' 
 'O'  'O'   0.0106   0.0060 
 'International Tables Vol C Tables 4.2.6.8 and 6.1.1.4' 
 'Cr'  'Cr'   0.3209   0.6236 
 'International Tables Vol C Tables 4.2.6.8 and 6.1.1.4' 
 'Cl'  'Cl'   0.1484   0.1585 
 'International Tables Vol C Tables 4.2.6.8 and 6.1.1.4' 
 'F'  'F'   0.0171   0.0103 
 'International Tables Vol C Tables 4.2.6.8 and 6.1.1.4' 
 
_symmetry_cell_setting            triclinic 
_symmetry_space_group_name_H-M    P-1 
 
loop_ 
 _symmetry_equiv_pos_as_xyz 
 'x, y, z' 
 '-x, -y, -z' 
 
_cell_length_a                    9.518(3) 
_cell_length_b                    9.950(3) 
_cell_length_c                    10.948(4) 
_cell_angle_alpha                 98.812(5) 
_cell_angle_beta                  106.707(5) 
_cell_angle_gamma                 114.349(4) 
_cell_volume                      859.7(5) 
_cell_formula_units_Z             2 
_cell_measurement_temperature     293(2) 
_cell_measurement_reflns_used     ? 
_cell_measurement_theta_min       ? 
_cell_measurement_theta_max       ? 
 
_exptl_crystal_description        block 
_exptl_crystal_colour             orange 
_exptl_crystal_size_max           0.25 
_exptl_crystal_size_mid           0.2 
_exptl_crystal_size_min           0.2 
_exptl_crystal_density_meas       ? 
_exptl_crystal_density_diffrn     1.575 
_exptl_crystal_density_method     'not measured' 
_exptl_crystal_F_000              426 
_exptl_absorpt_coefficient_mu     0.868 
_exptl_absorpt_correction_type    'empirical'
_exptl_absorpt_correction_T_min   0.506 
_exptl_absorpt_correction_T_max   0.614 
_exptl_absorpt_process_details    'psi scan' 
 
_exptl_special_details 
; 
 ? 
; 
 
_diffrn_ambient_temperature       293(2) 
_diffrn_radiation_wavelength      0.71073 
_diffrn_radiation_type            MoK\a 
_diffrn_radiation_source          'fine-focus sealed tube' 
_diffrn_radiation_monochromator   graphite 
_diffrn_measurement_device_type   'smart 1000 CCD' 
_diffrn_measurement_method        'Omega scan' 
_diffrn_detector_area_resol_mean  ? 
_diffrn_reflns_number             6701 
_diffrn_reflns_av_R_equivalents   0.0516 
_diffrn_reflns_av_sigmaI/netI     0.0414 
_diffrn_reflns_limit_h_min        -11 
_diffrn_reflns_limit_h_max        11 
_diffrn_reflns_limit_k_min        -12 
_diffrn_reflns_limit_k_max        11 
_diffrn_reflns_limit_l_min        -12 
_diffrn_reflns_limit_l_max        13 
_diffrn_reflns_theta_min          2.04 
_diffrn_reflns_theta_max          25.68 
_reflns_number_total              3200 
_reflns_number_gt                 2814 
_reflns_threshold_expression      >2sigma(I) 
 
_computing_data_collection        ? 
_computing_cell_refinement        ? 
_computing_data_reduction         ? 
_computing_structure_solution     'SHELXS-97 (Sheldrick, 2008)' 
_computing_structure_refinement   'SHELXL-97 (Sheldrick, 2008)' 
_computing_molecular_graphics     ? 
_computing_publication_material   ? 
 
_refine_special_details 
; 
 Refinement of F^2^ against ALL reflections.  The weighted R-factor wR and 
 goodness of fit S are based on F^2^, conventional R-factors R are based 
 on F, with F set to zero for negative F^2^. The threshold expression of 
 F^2^ > 2sigma(F^2^) is used only for calculating R-factors(gt) etc. and is 
 not relevant to the choice of reflections for refinement.  R-factors based 
 on F^2^ are statistically about twice as large as those based on F, and R- 
 factors based on ALL data will be even larger. 
; 
 
_refine_ls_structure_factor_coef  Fsqd  
_refine_ls_matrix_type            full 
_refine_ls_weighting_scheme       calc  
_refine_ls_weighting_details 
 'calc w=1/[\s^2^(Fo^2^)+(0.0919P)^2^+1.6474P] where P=(Fo^2^+2Fc^2^)/3' 
_atom_sites_solution_primary      direct 
_atom_sites_solution_secondary    difmap 
_atom_sites_solution_hydrogens    geom 
_refine_ls_hydrogen_treatment     mixed 
_refine_ls_extinction_method      SHELXL 
_refine_ls_extinction_coef        0.118(10) 
_refine_ls_extinction_expression 
 'Fc^*^=kFc[1+0.001xFc^2^\l^3^/sin(2\q)]^-1/4^' 
_refine_ls_number_reflns          3200 
_refine_ls_number_parameters      232 
_refine_ls_number_restraints      3 
_refine_ls_R_factor_all           0.0646 
_refine_ls_R_factor_gt            0.0595 
_refine_ls_wR_factor_ref          0.1770 
_refine_ls_wR_factor_gt           0.1716 
_refine_ls_goodness_of_fit_ref    1.116 
_refine_ls_restrained_S_all       1.115 
_refine_ls_shift/su_max           0.100 
_refine_ls_shift/su_mean          0.002 
 
loop_ 
 _atom_site_label 
 _atom_site_type_symbol 
 _atom_site_fract_x 
 _atom_site_fract_y 
 _atom_site_fract_z 
 _atom_site_U_iso_or_equiv 
 _atom_site_adp_type 
 _atom_site_occupancy 
 _atom_site_symmetry_multiplicity 
 _atom_site_calc_flag 
 _atom_site_refinement_flags 
 _atom_site_disorder_assembly 
 _atom_site_disorder_group 
C1 C 0.8509(5) 0.6757(5) 0.0613(5) 0.0464(10) Uani 1 1 d . . . 
H1A H 0.8426 0.6630 -0.0306 0.056 Uiso 1 1 calc R . . 
H1B H 0.9661 0.7106 0.1186 0.056 Uiso 1 1 calc R . . 
C2 C 0.7983(5) 0.7948(5) 0.1036(5) 0.0446(10) Uani 1 1 d . . . 
H2A H 0.8151 0.8138 0.1976 0.054 Uiso 1 1 calc R . . 
H2B H 0.8654 0.8922 0.0915 0.054 Uiso 1 1 calc R . . 
C3 C 0.5448(6) 0.8249(5) 0.0678(5) 0.0472(11) Uani 1 1 d . . . 
H3A H 0.6052 0.9307 0.0676 0.057 Uiso 1 1 calc R . . 
H3B H 0.5577 0.8276 0.1594 0.057 Uiso 1 1 calc R . . 
C4 C 0.3598(6) 0.7573(5) -0.0191(5) 0.0492(11) Uani 1 1 d . . . 
H4A H 0.3245 0.8327 0.0045 0.059 Uiso 1 1 calc R . . 
H4B H 0.3467 0.7421 -0.1121 0.059 Uiso 1 1 calc R . . 
C5 C 0.7558(6) 0.3951(6) 0.0071(4) 0.0451(10) Uani 1 1 d . . . 
H5A H 0.8707 0.4161 0.0480 0.054 Uiso 1 1 calc R . . 
H5B H 0.7304 0.3865 -0.0870 0.054 Uiso 1 1 calc R . . 
C6 C 0.8781(7) 0.1768(5) 0.3809(5) 0.0601(14) Uani 1 1 d . . . 
H6A H 0.8983 0.0886 0.3720 0.072 Uiso 1 1 calc R . . 
H6B H 0.8001 0.1640 0.2947 0.072 Uiso 1 1 calc R . . 
C7 C 0.8052(7) 0.1838(6) 0.4839(6) 0.0599(14) Uani 1 1 d . . . 
H7A H 0.8786 0.1880 0.5686 0.072 Uiso 1 1 calc R . . 
H7B H 0.6972 0.0921 0.4553 0.072 Uiso 1 1 calc R . . 
C8 C 0.7426(7) 0.3623(7) 0.6174(6) 0.0631(15) Uani 1 1 d . . . 
H8A H 0.8284 0.3741 0.6985 0.076 Uiso 1 1 calc R . . 
H8B H 0.6373 0.2762 0.6060 0.076 Uiso 1 1 calc R . . 
C9 C 0.7278(8) 0.5086(9) 0.6328(6) 0.0694(17) Uani 1 1 d . . . 
H9A H 0.6735 0.5130 0.6949 0.083 Uiso 1 1 calc R . . 
H9B H 0.6556 0.5024 0.5467 0.083 Uiso 1 1 calc R . . 
C10 C 1.1079(8) 0.3419(7) 0.3174(5) 0.0618(14) Uani 1 1 d . . . 
H10A H 1.0280 0.3423 0.2392 0.074 Uiso 1 1 calc R . . 
H10B H 1.1256 0.2545 0.2906 0.074 Uiso 1 1 calc R . . 
Cl Cl 0.32619(16) 0.06710(14) 0.25268(12) 0.0533(4) Uani 1 1 d . . . 
Cr1 Cr 0.5000 0.5000 0.0000 0.0250(3) Uani 1 2 d S . . 
Cr2 Cr 1.0000 0.5000 0.5000 0.0267(3) Uani 1 2 d S . . 
F1 F 0.4929(3) 0.4536(3) -0.1756(2) 0.0373(5) Uani 1 1 d . . . 
F2 F 0.8795(3) 0.4902(3) 0.3263(2) 0.0388(6) Uani 1 1 d . . . 
N1 N 0.7387(4) 0.5258(4) 0.0729(3) 0.0336(7) Uani 1 1 d . . . 
H1 H 0.768(6) 0.535(5) 0.162(5) 0.040 Uiso 1 1 calc . . . 
N2 N 0.6184(4) 0.7328(4) 0.0193(3) 0.0354(7) Uani 1 1 d . . . 
H2 H 0.612(6) 0.740(5) -0.064(5) 0.043 Uiso 1 1 calc . . . 
N3 N 1.0383(5) 0.3229(4) 0.4223(4) 0.0420(8) Uani 1 1 d . . . 
H3 H 1.114(7) 0.318(6) 0.492(5) 0.050 Uiso 1 1 calc . . . 
N4 N 0.7857(4) 0.3261(4) 0.5002(4) 0.0429(8) Uani 1 1 d . . . 
H4 H 0.699(7) 0.308(6) 0.425(6) 0.051 Uiso 1 1 calc . . . 
O1 O 0.2604(5) 0.2323(5) 0.5932(3) 0.0593(9) Uani 1 1 d D . . 
O2 O 0.296(2) 0.0971(15) 0.3595(9) 0.249(7) Uani 1 1 d . . . 
O3 O 0.2010(7) 0.0374(10) 0.1321(7) 0.150(3) Uani 1 1 d . . . 
O4 O 0.3521(19) -0.0548(12) 0.2583(9) 0.216(6) Uani 1 1 d . . . 
O5 O 0.4591(9) 0.1810(13) 0.2508(9) 0.277(8) Uani 1 1 d . . . 
H11 H 0.349(4) 0.314(4) 0.660(4) 0.067(17) Uiso 1 1 d D . . 
H12 H 0.305(6) 0.208(6) 0.538(4) 0.074(19) Uiso 1 1 d D . . 
 
loop_ 
 _atom_site_aniso_label 
 _atom_site_aniso_U_11 
 _atom_site_aniso_U_22 
 _atom_site_aniso_U_33 
 _atom_site_aniso_U_23 
 _atom_site_aniso_U_13 
 _atom_site_aniso_U_12 
C1 0.032(2) 0.052(3) 0.045(2) 0.020(2) 0.0140(18) 0.0108(19) 
C2 0.037(2) 0.034(2) 0.042(2) 0.0119(18) 0.0078(18) 0.0039(17) 
C3 0.066(3) 0.031(2) 0.040(2) 0.0086(17) 0.012(2) 0.026(2) 
C4 0.067(3) 0.048(3) 0.040(2) 0.0115(19) 0.012(2) 0.040(2) 
C5 0.049(2) 0.061(3) 0.038(2) 0.016(2) 0.0175(19) 0.037(2) 
C6 0.065(3) 0.035(2) 0.052(3) -0.001(2) -0.005(2) 0.024(2) 
C7 0.051(3) 0.037(2) 0.070(3) 0.024(2) 0.007(2) 0.011(2) 
C8 0.049(3) 0.092(4) 0.059(3) 0.044(3) 0.033(2) 0.029(3) 
C9 0.068(3) 0.124(5) 0.057(3) 0.043(3) 0.042(3) 0.065(4) 
C10 0.080(4) 0.093(4) 0.039(2) 0.016(3) 0.026(3) 0.065(3) 
Cl 0.0541(7) 0.0559(7) 0.0510(7) 0.0206(5) 0.0222(5) 0.0250(6) 
Cr1 0.0265(4) 0.0248(4) 0.0203(4) 0.0071(3) 0.0076(3) 0.0103(3) 
Cr2 0.0263(4) 0.0291(5) 0.0216(4) 0.0078(3) 0.0064(3) 0.0127(3) 
F1 0.0421(13) 0.0435(13) 0.0241(11) 0.0100(9) 0.0129(9) 0.0190(10) 
F2 0.0408(12) 0.0471(13) 0.0258(11) 0.0125(10) 0.0063(9) 0.0228(11) 
N1 0.0325(16) 0.0399(18) 0.0252(16) 0.0105(13) 0.0084(13) 0.0164(14) 
N2 0.0414(18) 0.0272(16) 0.0275(16) 0.0094(13) 0.0087(14) 0.0104(14) 
N3 0.049(2) 0.046(2) 0.0319(18) 0.0085(15) 0.0068(16) 0.0303(17) 
N4 0.0325(18) 0.049(2) 0.040(2) 0.0210(16) 0.0080(16) 0.0149(16) 
O1 0.057(2) 0.072(2) 0.0399(18) 0.0061(17) 0.0086(16) 0.0347(19) 
O2 0.54(2) 0.367(15) 0.164(7) 0.178(9) 0.261(12) 0.392(17) 
O3 0.059(3) 0.232(8) 0.108(4) 0.106(5) 0.005(3) 0.025(4) 
O4 0.471(19) 0.228(10) 0.137(6) 0.101(7) 0.155(10) 0.295(13) 
O5 0.092(5) 0.322(12) 0.158(7) 0.176(8) -0.049(4) -0.098(6) 
 
_geom_special_details 
; 
 All esds (except the esd in the dihedral angle between two l.s. planes) 
 are estimated using the full covariance matrix.  The cell esds are taken 
 into account individually in the estimation of esds in distances, angles 
 and torsion angles; correlations between esds in cell parameters are only 
 used when they are defined by crystal symmetry.  An approximate (isotropic) 
 treatment of cell esds is used for estimating esds involving l.s. planes. 
; 
 
loop_ 
 _geom_bond_atom_site_label_1 
 _geom_bond_atom_site_label_2 
 _geom_bond_distance 
 _geom_bond_site_symmetry_2 
 _geom_bond_publ_flag 
C1 N1 1.485(5) . ? 
C1 C2 1.525(7) . ? 
C1 H1A 0.9700 . ? 
C1 H1B 0.9700 . ? 
C2 N2 1.487(5) . ? 
C2 H2A 0.9700 . ? 
C2 H2B 0.9700 . ? 
C3 N2 1.485(6) . ? 
C3 C4 1.524(7) . ? 
C3 H3A 0.9700 . ? 
C3 H3B 0.9700 . ? 
C4 C5 1.514(7) 2_665 ? 
C4 H4A 0.9700 . ? 
C4 H4B 0.9700 . ? 
C5 N1 1.481(5) . ? 
C5 C4 1.514(7) 2_665 ? 
C5 H5A 0.9700 . ? 
C5 H5B 0.9700 . ? 
C6 N3 1.489(7) . ? 
C6 C7 1.490(8) . ? 
C6 H6A 0.9700 . ? 
C6 H6B 0.9700 . ? 
C7 N4 1.493(7) . ? 
C7 H7A 0.9700 . ? 
C7 H7B 0.9700 . ? 
C8 N4 1.493(6) . ? 
C8 C9 1.508(9) . ? 
C8 H8A 0.9700 . ? 
C8 H8B 0.9700 . ? 
C9 C10 1.516(9) 2_766 ? 
C9 H9A 0.9700 . ? 
C9 H9B 0.9700 . ? 
C10 N3 1.481(6) . ? 
C10 C9 1.517(9) 2_766 ? 
C10 H10A 0.9700 . ? 
C10 H10B 0.9700 . ? 
Cl O2 1.303(6) . ? 
Cl O5 1.314(6) . ? 
Cl O4 1.340(6) . ? 
Cl O3 1.391(5) . ? 
Cr1 F1 1.882(2) . ? 
Cr1 F1 1.882(2) 2_665 ? 
Cr1 N2 2.059(3) . ? 
Cr1 N2 2.059(3) 2_665 ? 
Cr1 N1 2.068(3) . ? 
Cr1 N1 2.068(3) 2_665 ? 
Cr2 F2 1.882(2) . ? 
Cr2 F2 1.882(2) 2_766 ? 
Cr2 N3 2.051(4) 2_766 ? 
Cr2 N3 2.052(4) . ? 
Cr2 N4 2.061(4) . ? 
Cr2 N4 2.061(4) 2_766 ? 
N1 H1 0.91(5) . ? 
N2 H2 0.91(5) . ? 
N3 H3 0.91(6) . ? 
N4 H4 0.91(6) . ? 
O1 H11 0.896(10) . ? 
O1 H12 0.894(10) . ? 
 
loop_ 
 _geom_angle_atom_site_label_1 
 _geom_angle_atom_site_label_2 
 _geom_angle_atom_site_label_3 
 _geom_angle 
 _geom_angle_site_symmetry_1 
 _geom_angle_site_symmetry_3 
 _geom_angle_publ_flag 
N1 C1 C2 108.5(3) . . ? 
N1 C1 H1A 110.0 . . ? 
C2 C1 H1A 110.0 . . ? 
N1 C1 H1B 110.0 . . ? 
C2 C1 H1B 110.0 . . ? 
H1A C1 H1B 108.4 . . ? 
N2 C2 C1 108.4(3) . . ? 
N2 C2 H2A 110.0 . . ? 
C1 C2 H2A 110.0 . . ? 
N2 C2 H2B 110.0 . . ? 
C1 C2 H2B 110.0 . . ? 
H2A C2 H2B 108.4 . . ? 
N2 C3 C4 112.0(3) . . ? 
N2 C3 H3A 109.2 . . ? 
C4 C3 H3A 109.2 . . ? 
N2 C3 H3B 109.2 . . ? 
C4 C3 H3B 109.2 . . ? 
H3A C3 H3B 107.9 . . ? 
C5 C4 C3 115.3(4) 2_665 . ? 
C5 C4 H4A 108.5 2_665 . ? 
C3 C4 H4A 108.5 . . ? 
C5 C4 H4B 108.5 2_665 . ? 
C3 C4 H4B 108.5 . . ? 
H4A C4 H4B 107.5 . . ? 
N1 C5 C4 111.9(4) . 2_665 ? 
N1 C5 H5A 109.2 . . ? 
C4 C5 H5A 109.2 2_665 . ? 
N1 C5 H5B 109.2 . . ? 
C4 C5 H5B 109.2 2_665 . ? 
H5A C5 H5B 107.9 . . ? 
N3 C6 C7 109.3(4) . . ? 
N3 C6 H6A 109.8 . . ? 
C7 C6 H6A 109.8 . . ? 
N3 C6 H6B 109.8 . . ? 
C7 C6 H6B 109.8 . . ? 
H6A C6 H6B 108.3 . . ? 
C6 C7 N4 108.0(4) . . ? 
C6 C7 H7A 110.1 . . ? 
N4 C7 H7A 110.1 . . ? 
C6 C7 H7B 110.1 . . ? 
N4 C7 H7B 110.1 . . ? 
H7A C7 H7B 108.4 . . ? 
N4 C8 C9 112.0(4) . . ? 
N4 C8 H8A 109.2 . . ? 
C9 C8 H8A 109.2 . . ? 
N4 C8 H8B 109.2 . . ? 
C9 C8 H8B 109.2 . . ? 
H8A C8 H8B 107.9 . . ? 
C8 C9 C10 115.1(4) . 2_766 ? 
C8 C9 H9A 108.5 . . ? 
C10 C9 H9A 108.5 2_766 . ? 
C8 C9 H9B 108.5 . . ? 
C10 C9 H9B 108.5 2_766 . ? 
H9A C9 H9B 107.5 . . ? 
N3 C10 C9 111.5(4) . 2_766 ? 
N3 C10 H10A 109.3 . . ? 
C9 C10 H10A 109.3 2_766 . ? 
N3 C10 H10B 109.3 . . ? 
C9 C10 H10B 109.3 2_766 . ? 
H10A C10 H10B 108.0 . . ? 
O2 Cl O5 114.2(9) . . ? 
O2 Cl O4 103.2(5) . . ? 
O5 Cl O4 109.3(9) . . ? 
O2 Cl O3 115.2(7) . . ? 
O5 Cl O3 102.7(4) . . ? 
O4 Cl O3 112.4(7) . . ? 
F1 Cr1 F1 180.00(3) . 2_665 ? 
F1 Cr1 N2 89.23(12) . . ? 
F1 Cr1 N2 90.77(12) 2_665 . ? 
F1 Cr1 N2 90.77(12) . 2_665 ? 
F1 Cr1 N2 89.23(12) 2_665 2_665 ? 
N2 Cr1 N2 180.0 . 2_665 ? 
F1 Cr1 N1 89.46(12) . . ? 
F1 Cr1 N1 90.54(12) 2_665 . ? 
N2 Cr1 N1 85.34(14) . . ? 
N2 Cr1 N1 94.66(14) 2_665 . ? 
F1 Cr1 N1 90.54(12) . 2_665 ? 
F1 Cr1 N1 89.46(12) 2_665 2_665 ? 
N2 Cr1 N1 94.66(14) . 2_665 ? 
N2 Cr1 N1 85.34(14) 2_665 2_665 ? 
N1 Cr1 N1 180.0 . 2_665 ? 
F2 Cr2 F2 180.00(16) . 2_766 ? 
F2 Cr2 N3 89.20(12) . 2_766 ? 
F2 Cr2 N3 90.80(12) 2_766 2_766 ? 
F2 Cr2 N3 90.80(12) . . ? 
F2 Cr2 N3 89.20(12) 2_766 . ? 
N3 Cr2 N3 180.00(19) 2_766 . ? 
F2 Cr2 N4 90.22(13) . . ? 
F2 Cr2 N4 89.78(13) 2_766 . ? 
N3 Cr2 N4 94.85(16) 2_766 . ? 
N3 Cr2 N4 85.15(16) . . ? 
F2 Cr2 N4 89.78(13) . 2_766 ? 
F2 Cr2 N4 90.22(13) 2_766 2_766 ? 
N3 Cr2 N4 85.15(16) 2_766 2_766 ? 
N3 Cr2 N4 94.85(16) . 2_766 ? 
N4 Cr2 N4 180.0 . 2_766 ? 
C5 N1 C1 112.4(3) . . ? 
C5 N1 Cr1 114.8(3) . . ? 
C1 N1 Cr1 106.2(3) . . ? 
C5 N1 H1 108(3) . . ? 
C1 N1 H1 108(3) . . ? 
Cr1 N1 H1 108(3) . . ? 
C3 N2 C2 113.1(3) . . ? 
C3 N2 Cr1 116.0(3) . . ? 
C2 N2 Cr1 106.7(2) . . ? 
C3 N2 H2 107(3) . . ? 
C2 N2 H2 107(3) . . ? 
Cr1 N2 H2 107(3) . . ? 
C10 N3 C6 114.3(4) . . ? 
C10 N3 Cr2 116.1(3) . . ? 
C6 N3 Cr2 106.4(3) . . ? 
C10 N3 H3 106(3) . . ? 
C6 N3 H3 107(3) . . ? 
Cr2 N3 H3 106(3) . . ? 
C8 N4 C7 113.4(4) . . ? 
C8 N4 Cr2 115.4(3) . . ? 
C7 N4 Cr2 106.3(3) . . ? 
C8 N4 H4 107(3) . . ? 
C7 N4 H4 107(3) . . ? 
Cr2 N4 H4 107(3) . . ? 
H11 O1 H12 103.0(15) . . ? 
 
loop_ 
 _geom_torsion_atom_site_label_1 
 _geom_torsion_atom_site_label_2 
 _geom_torsion_atom_site_label_3 
 _geom_torsion_atom_site_label_4 
 _geom_torsion 
 _geom_torsion_site_symmetry_1 
 _geom_torsion_site_symmetry_2 
 _geom_torsion_site_symmetry_3 
 _geom_torsion_site_symmetry_4 
 _geom_torsion_publ_flag 
N1 C1 C2 N2 -56.1(4) . . . . ? 
N2 C3 C4 C5 70.4(5) . . . 2_665 ? 
N3 C6 C7 N4 56.1(5) . . . . ? 
N4 C8 C9 C10 -72.1(6) . . . 2_766 ? 
C4 C5 N1 C1 -179.7(3) 2_665 . . . ? 
C4 C5 N1 Cr1 -58.2(4) 2_665 . . . ? 
C2 C1 N1 C5 167.8(3) . . . . ? 
C2 C1 N1 Cr1 41.5(4) . . . . ? 
F1 Cr1 N1 C5 -50.8(3) . . . . ? 
F1 Cr1 N1 C5 129.2(3) 2_665 . . . ? 
N2 Cr1 N1 C5 -140.1(3) . . . . ? 
N2 Cr1 N1 C5 39.9(3) 2_665 . . . ? 
N1 Cr1 N1 C5 4(6) 2_665 . . . ? 
F1 Cr1 N1 C1 74.0(3) . . . . ? 
F1 Cr1 N1 C1 -106.0(3) 2_665 . . . ? 
N2 Cr1 N1 C1 -15.3(3) . . . . ? 
N2 Cr1 N1 C1 164.7(3) 2_665 . . . ? 
N1 Cr1 N1 C1 128(6) 2_665 . . . ? 
C4 C3 N2 C2 -179.1(4) . . . . ? 
C4 C3 N2 Cr1 -55.3(4) . . . . ? 
C1 C2 N2 C3 169.3(3) . . . . ? 
C1 C2 N2 Cr1 40.5(4) . . . . ? 
F1 Cr1 N2 C3 129.3(3) . . . . ? 
F1 Cr1 N2 C3 -50.7(3) 2_665 . . . ? 
N2 Cr1 N2 C3 -35(5) 2_665 . . . ? 
N1 Cr1 N2 C3 -141.2(3) . . . . ? 
N1 Cr1 N2 C3 38.8(3) 2_665 . . . ? 
F1 Cr1 N2 C2 -103.6(3) . . . . ? 
F1 Cr1 N2 C2 76.4(3) 2_665 . . . ? 
N2 Cr1 N2 C2 92(5) 2_665 . . . ? 
N1 Cr1 N2 C2 -14.1(3) . . . . ? 
N1 Cr1 N2 C2 165.9(3) 2_665 . . . ? 
C9 C10 N3 C6 -179.0(4) 2_766 . . . ? 
C9 C10 N3 Cr2 56.5(5) 2_766 . . . ? 
C7 C6 N3 C10 -169.9(4) . . . . ? 
C7 C6 N3 Cr2 -40.4(4) . . . . ? 
F2 Cr2 N3 C10 51.4(3) . . . . ? 
F2 Cr2 N3 C10 -128.6(3) 2_766 . . . ? 
N3 Cr2 N3 C10 80(27) 2_766 . . . ? 
N4 Cr2 N3 C10 141.6(3) . . . . ? 
N4 Cr2 N3 C10 -38.4(3) 2_766 . . . ? 
F2 Cr2 N3 C6 -77.1(3) . . . . ? 
F2 Cr2 N3 C6 102.9(3) 2_766 . . . ? 
N3 Cr2 N3 C6 -49(27) 2_766 . . . ? 
N4 Cr2 N3 C6 13.1(3) . . . . ? 
N4 Cr2 N3 C6 -166.9(3) 2_766 . . . ? 
C9 C8 N4 C7 178.7(4) . . . . ? 
C9 C8 N4 Cr2 55.8(5) . . . . ? 
C6 C7 N4 C8 -169.7(4) . . . . ? 
C6 C7 N4 Cr2 -41.9(4) . . . . ? 
F2 Cr2 N4 C8 -126.9(3) . . . . ? 
F2 Cr2 N4 C8 53.1(3) 2_766 . . . ? 
N3 Cr2 N4 C8 -37.7(3) 2_766 . . . ? 
N3 Cr2 N4 C8 142.3(3) . . . . ? 
N4 Cr2 N4 C8 167(19) 2_766 . . . ? 
F2 Cr2 N4 C7 106.5(3) . . . . ? 
F2 Cr2 N4 C7 -73.5(3) 2_766 . . . ? 
N3 Cr2 N4 C7 -164.3(3) 2_766 . . . ? 
N3 Cr2 N4 C7 15.7(3) . . . . ? 
N4 Cr2 N4 C7 41(19) 2_766 . . . ? 
 
_diffrn_measured_fraction_theta_max    0.983 
_diffrn_reflns_theta_full              25.68 
_diffrn_measured_fraction_theta_full   0.983 
_refine_diff_density_max    1.105 
_refine_diff_density_min   -0.944 
_refine_diff_density_rms    0.104 
